# Supplementary material for: Yolk–shell Nb2O5 microspheres as intercalation pseudocapacitive anode materials for high-energy Li-ion capacitors
Source: Royal Society of Chemistry journal article supplement (doi:10.1039/c9ta02342a), 2019-01-01
Supplement: c9ta02342a1.pdf [file c9ta02342a1.pdf]

## Electronic Supplementary Information

### Yolk-Shell Nb<sub>2</sub>O<sub>5</sub> Microspheres as Intercalation Pseudocapacitive Anode

#### Materials for High-Energy Li-ion Capacitors

Shida Fu, Qiang Yu, Zhenhui Liu, Ping Hu, Qiang Chen, Shihao Feng,

Liqiang Mai and Liang Zhou\*

State Key Laboratory of Advanced Technology for Materials Synthesis and Processing, Wuhan University of Technology, Wuhan 430070, Hubei, China.

E-mail: liangzhou@whut.edu.cn (L. Zhou)

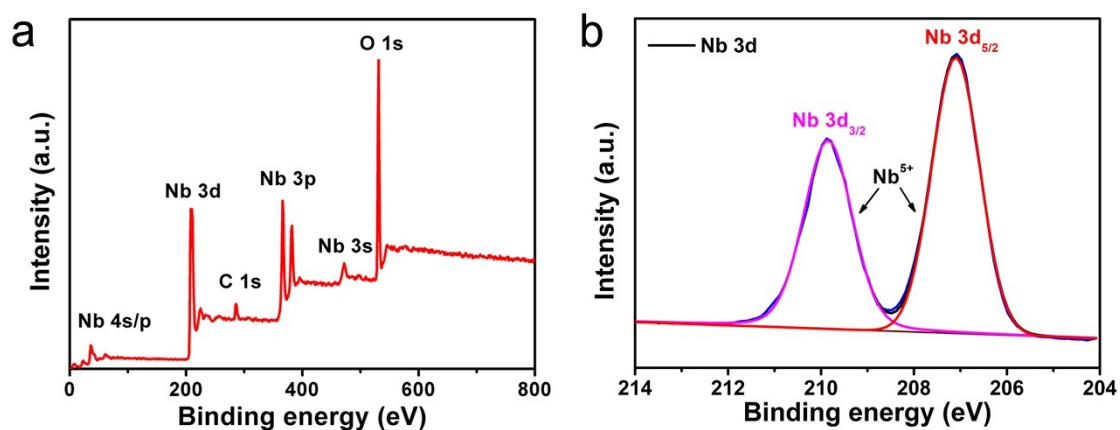

**Figure S1.** (a) XPS survey spectrum and (b) Nb 3d high-resolution XPS spectrum of the YS-Nb<sub>2</sub>O<sub>5</sub>-600.

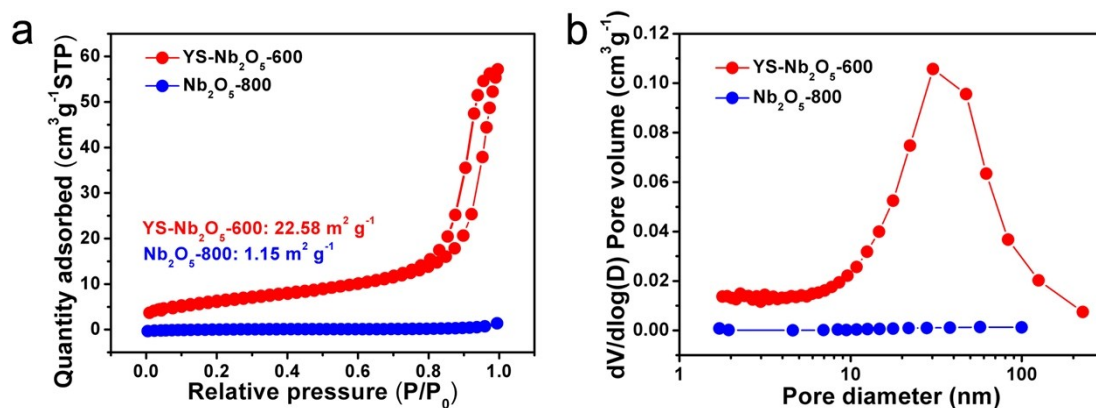

**Figure S2.** (a) Nitrogen adsorption-desorption isotherms and (b) the corresponding pore size distributions of YS-Nb<sub>2</sub>O<sub>5</sub>-600 and Nb<sub>2</sub>O<sub>5</sub>-800.

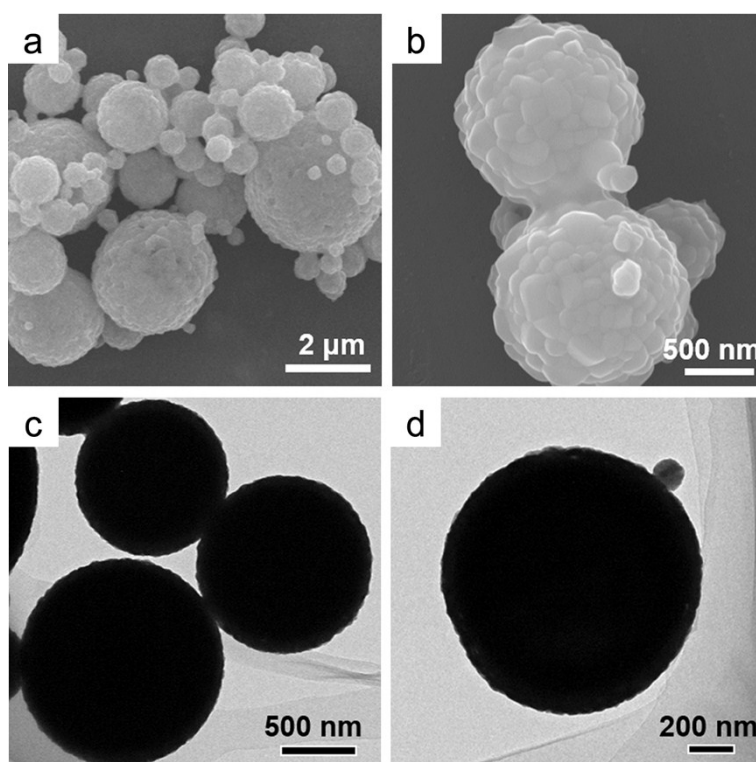

**Figure S3.** (a, b) SEM images and (c, d) TEM images of Nb<sub>2</sub>O<sub>5</sub>-800.

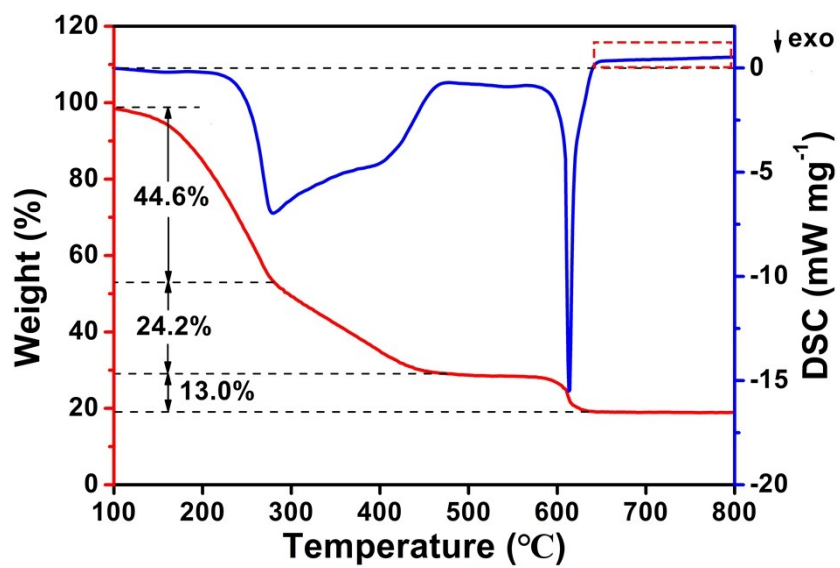

**Figure S4.** TG and DSC curves of the intermediate at 100 – 800 °C.

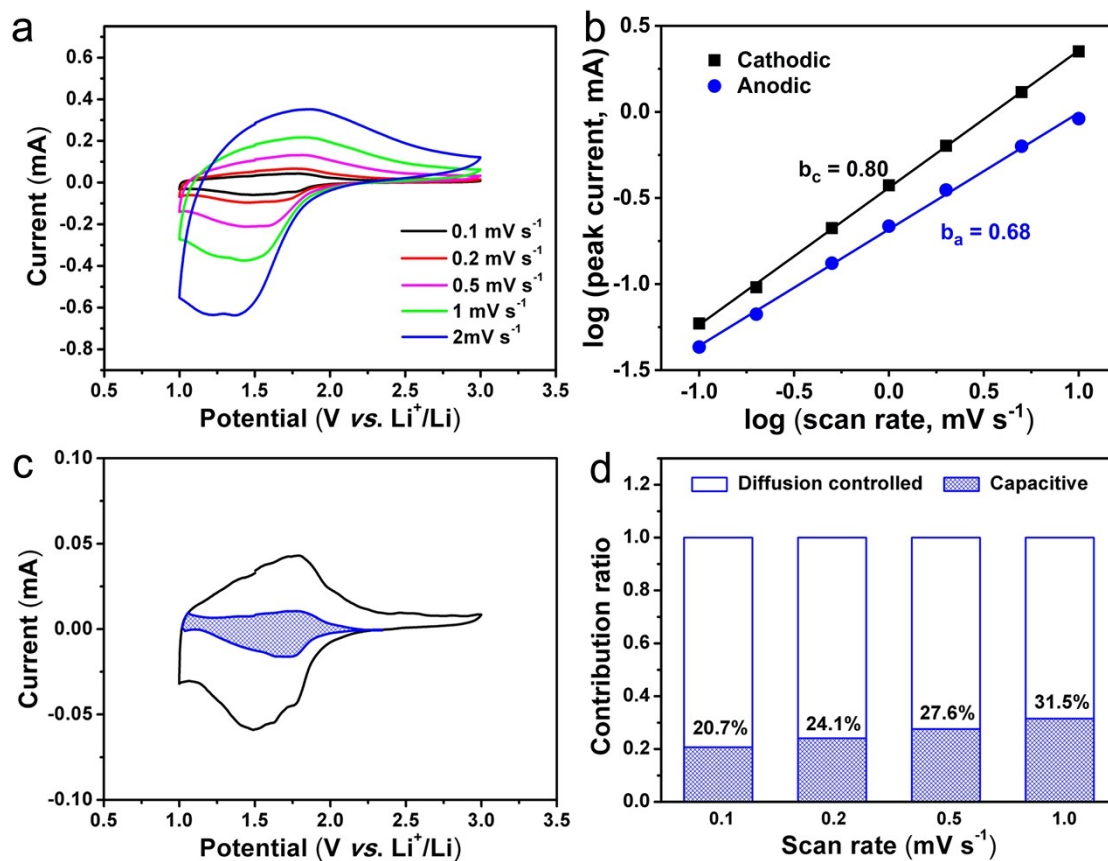

**Figure S5.** (a) CV curves of Nb<sub>2</sub>O<sub>5</sub>-800 at different scan rates (from 0.1 to 2 mV s<sup>-1</sup>), (b) logarithmic relationships between the peak currents and scan rates, (c) CV curves of Nb<sub>2</sub>O<sub>5</sub>-800 with separation between total current (solid line) and capacitive current (shaded regions) at 0.1 mV s<sup>-1</sup>, (d) contribution ratios of capacitive capacities and diffusion-limited capacities at various scan rates.

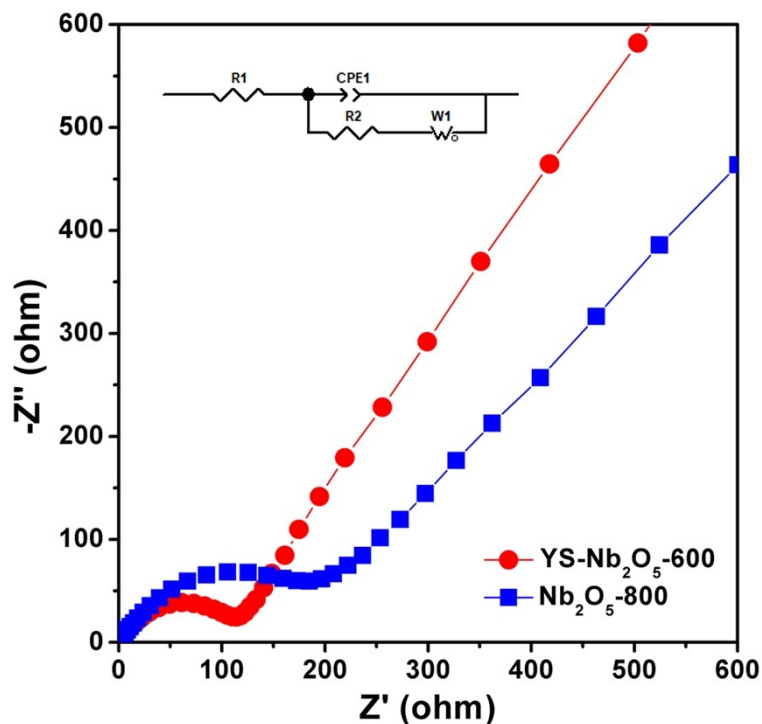

**Figure S6.** Nyquist plots of the YS-Nb<sub>2</sub>O<sub>5</sub>-600 and Nb<sub>2</sub>O<sub>5</sub>-800 based electrodes by applying an AC voltage of 5 mV amplitude at 10 mHz to 100 kHz.

**Table S1.** Specification of the commercial activated carbon (YEC-8B)

| Item                        | YEC-8B                                |
|-----------------------------|---------------------------------------|
| Surface Area                | ≥ 2000 m <sup>2</sup> g <sup>-1</sup> |
| Average particle size (D50) | ~10 μm                                |
| Tap density                 | 0.38 – 0.4 g cc <sup>-1</sup>         |
| Capacitance                 | ~ 200 F g <sup>-1</sup>               |

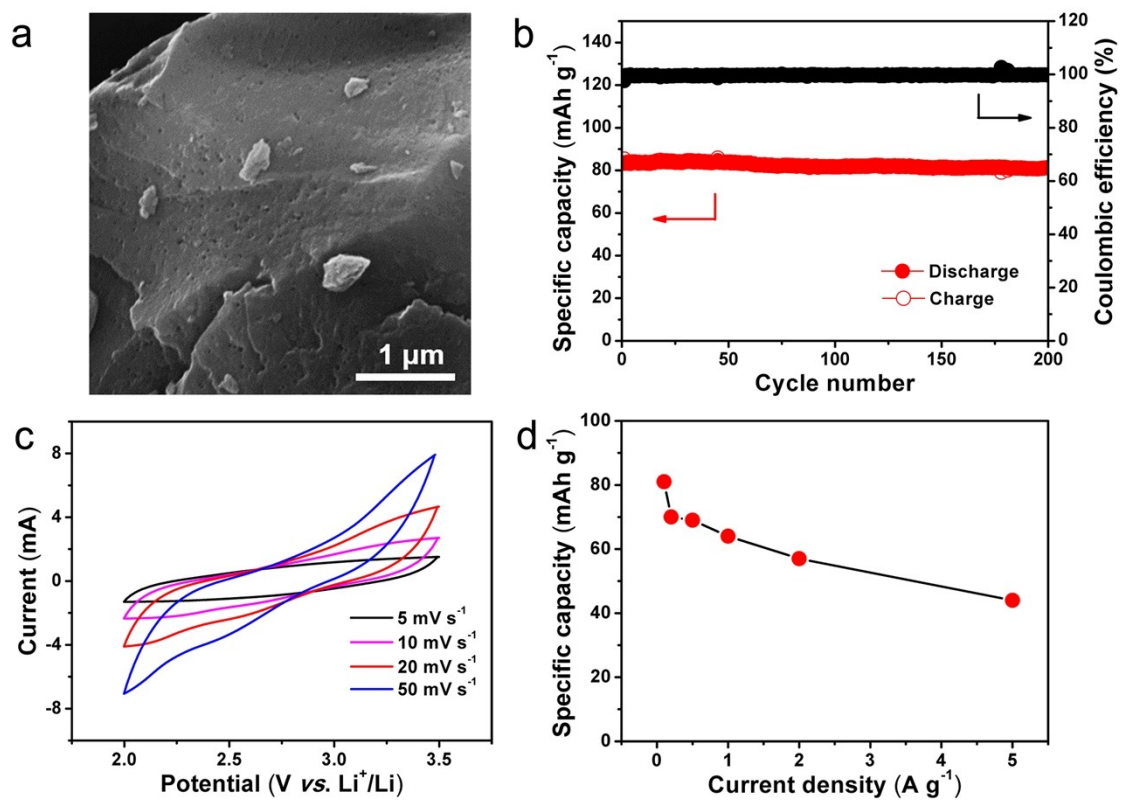

**Figure S7.** (a) SEM image of the YEC-8B, (b) cycling performance of YEC-8B at 100  $\text{mA g}^{-1}$  (potential window: 2.0 – 3.5 V), (c) CV curves at different scan rates (potential window: 2.0 – 3.5 V), and (d) rate performances of YEC-8B at various current densities (from 0.1 to 5  $\text{A g}^{-1}$ ).

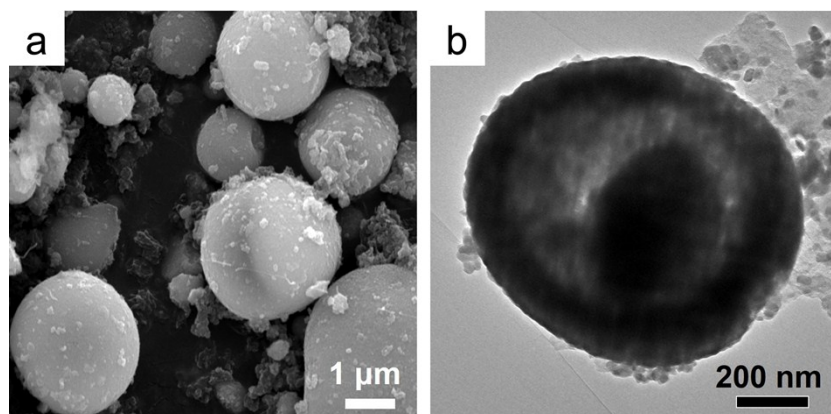

**Figure S8.** (a) SEM and (b) TEM images of YS-Nb<sub>2</sub>O<sub>5</sub> after 1000 cycles at 0.5 A g<sup>-1</sup> in LICs (voltage window of 1.0 – 3.5 V).
